# Supplementary material for: Biomass composite with exogenous organic acid addition supports the growth of sweet sorghum (Sorghum bicolor ‘Dochna’) by reducing salinity and increasing nutrient levels in coastal saline–alkaline soil
Source: Front Plant Sci. 2023 Mar 28;14:1163195. doi: 10.3389/fpls.2023.1163195 (PMC10086266; doi:10.3389/fpls.2023.1163195)
Supplement: Supplementary file 1 [file Table_1.xlsx]

## Sheet: Table S1
TABLE 1 Soil pH, electrical conductivity, soluble salt content, organic matter, alkali-hydrolyzed nitrogen, and available phosphorus in mudflat soil with different types of exogenous organic acids or biomass material additions.
Times	Treatments	Soil pH	Soil electrical conductivity (μs cm-1)	Soil soluble salt content (g kg-1)	Organic matter content (g kg-1)	Available phosphorus content (mg kg-1)	Alkali-hydrolyzed nitrogen content (mg kg-1)
Seedling stage	H	8.68±0.10a	328.2±17.94a	2.10±0.12a	4.23±1.29c	22.31±1.99c	20.71±2.15c
	F	8.59±0.10a	293.3±32.46b	1.86±0.22b	4.73±1.08b	26.51±2.09b	23.79±2.94b
	C	8.48±0.10b	259.8±17.75c	1.63±0.12c	6.02±0.81a	30.38±3.87a	27.63±1.50a
	CH	8.59±0.13ab	294.9±32.70b	1.87±0.23b	4.89±0.42b	26.35±3.54b	24.15±3.18c
	CM	8.65±0.10a	324.0±29.08a	2.07±0.20a	4.01±1.69c	23.13±2.87c	20.95±3.88d
	GC	8.55±0.13ab	287.2±38.34c	1.82±0.26c	4.71±0.82b	27.00±3.98b	25.05±2.49b
	PN	8.54±0.14b	269.1±26.23d	1.69±0.18d	6.36±0.60a	29.12±4.84a	26.02±3.13a
Elongation stage	H	9.05±0.08a	414.2±94.70a	2.69±0.65a	8.59±1.78b	22.65±3.42b	18.86±1.91b
	F	8.93±0.09b	301.1±59.05b	1.91±0.41b	10.96±1.67a	30.29±4.34a	26.74±7.55a
	C	8.90±0.12b	276.4±70.41c	1.74±0.49c	11.17±1.68a	30.69±4.38a	27.34±5.65a
	CH	8.99±0.12a	391.8±135.30a	2.54±0.93a	8.95±2.33c	26.14±6.57c	22.16±4.89c
	CM	8.94±0.13ab	319.9±48.62c	2.04±0.34c	10.35±1.76b	28.00±4.11b	24.27±4.95b
	GC	9.02±0.07a	362.0±14.61b	2.33±0.1b	9.76±0.98b	24.78±0.88d	19.79±0.73d
	PN	8.89±0.10b	248.6±78.88d	1.55±0.54d	11.91±1.86a	32.59±5.48a	31.05±8.12a
Heading stage	H	8.92±0.08a	423.3±61.22a	2.75±0.42a	7.50±0.72c	23.38±3.85c	17.19±2.61c
	F	8.79±0.09b	280.9±35.22c	1.77±0.24c	11.08±2.00a	31.37±2.93a	21.53±1.37a
	C	8.82±0.09b	323.6±72.27b	2.07±0.50b	9.79±1.52b	27.77±2.41b	19.72±2.53b
	CH	8.88±0.08a	356.7±62.16b	2.29±0.43b	8.92±1.10b	26.18±2.38c	18.53±2.39b
	CM	8.79±0.08b	313.8±73.57c	2.00±0.51c	10.22±2.12a	29.24±3.74b	21.16±1.04a
	GC	8.92±0.08a	417.6±83.90a	2.71±0.58a	7.79±1.08c	23.93±4.95d	16.71±2.65c
	PN	8.78±0.10b	282.3±46.56d	1.78±0.32d	10.89±2.44a	30.68±3.60a	21.52±1.91a
The lowercase letters in the table represent whether there is significant difference. The same letters represent insignificant differences, while different letters represent significant differences (p < 0.05) within one development stage. H, humic acid; F, fulvic acid; C, citric acid; CH, cottonseed hull; CM, cow manure; GC, grass charcoal; PN, pine needle.
