# Supplementary material for: Biomass composite with exogenous organic acid addition supports the growth of sweet sorghum (Sorghum bicolor ‘Dochna’) by reducing salinity and increasing nutrient levels in coastal saline–alkaline soil
Source: Front Plant Sci. 2023 Mar 28;14:1163195. doi: 10.3389/fpls.2023.1163195 (PMC10086266; doi:10.3389/fpls.2023.1163195)
Supplement: Supplementary file 3 [file Table_3.xlsx]

## Sheet: Table S3
TABLE 3 Root activity, chlorophyll, malondialdehyde, proline, and soluble sugar content of sweet sorghum with the addition of different types of exogenous organic acids or biomass materials
Times	Treatments	Chlorophyll content (mg g-1FW)	Root activity (μg g-1h-1)	Malondialdehyde content (μmol g-1FW)	Proline content (μg g-1FW)	Soluble sugar content (mg g-1)
Seedling stage	H	1.26±0.24c	78.53±10.25c	11.26±1.19a	41.61±2.63c	21.97±1.38c
	F	1.45±0.20b	100.1±19.50b	10.25±1.62b	45.72±4.41b	23.39±1.81b
	C	1.63±0.11a	170.0±59.96a	8.56±1.20c	53.20±4.04a	25.70±1.37a
	CH	1.47±0.12b	105.7±31.78c	10.08±1.62b	46.32±5.42b	23.51±1.83b
	CM	1.17±0.27c	80.04±15.85d	11.53±1.30a	42.28±4.42c	21.77±1.96c
	GC	1.56±0.14a	123.2±44.48b	9.48±1.56bc	48.58±5.62a	24.38±1.60a
	PN	1.60±0.15a	156.0±76.11a	9.01±1.52c	50.19±6.47a	25.08±1.93a
Elongation stage	H	2.17±0.32c	146.5±15.35b	8.32±1.22a	35.41±2.95b	22.37±1.13c
	F	3.02±0.50b	182.5±25.60a	6.72±0.82b	43.14±5.24a	25.54±1.95b
	C	3.36±0.54a	186.7±29.47a	6.57±0.89b	43.37±6.14a	26.05±2.70a
	CH	2.71±0.53c	174.8±29.54b	7.93±1.82a	39.02±5.09c	24.07±2.33c
	CM	2.89±0.53b	177.3±30.79b	7.11±0.85b	41.69±6.53b	24.95±2.70b
	GC	2.33±0.47d	143.5±11.76c	7.59±0.29a	36.28±2.29d	22.75±0.80d
	PN	3.46±0.70a	192.0±22.75a	6.18±0.90c	45.57±6.04a	26.85±2.36a
Heading stage	H	1.93±0.13c	146.7±16.70c	18.16±2.66a	33.41±2.48c	30.39±1.62c
	F	2.53±0.33a	219.5±40.15a	9.25±3.72c	41.28±4.07a	35.61±2.24a
	C	2.28±0.31b	187.7±35.88b	12.39±3.97b	37.70±4.56b	33.39±2.72b
	CH	2.10±0.20c	173.7±21.30c	14.49±3.15b	35.82±3.08b	32.03±2.53b
	CM	2.40±0.34b	193.4±47.24b	11.73±4.97c	39.49±5.15a	34.49±2.62a
	GC	1.94±0.17d	150.7±20.99d	17.64±3.54a	33.64±3.43b	30.72±2.19c
	PN	2.53±0.38a	220.6±47.64a	9.20±4.50d	40.90±4.60a	35.27±2.85a
The lowercase letters in the table represent whether there is significant difference. The same letters represent insignificant differences, while different letters represent significant differences (p < 0.05) within one development stage. H, humic acid; F, fulvic acid; C, citric acid; CH, cottonseed hull; CM, cow manure; GC, grass charcoal; PN, pine needle.
