# Supplementary material for: Biomass composite with exogenous organic acid addition supports the growth of sweet sorghum (Sorghum bicolor ‘Dochna’) by reducing salinity and increasing nutrient levels in coastal saline–alkaline soil
Source: Front Plant Sci. 2023 Mar 28;14:1163195. doi: 10.3389/fpls.2023.1163195 (PMC10086266; doi:10.3389/fpls.2023.1163195)
Supplement: Supplementary file 4 [file Table_4.xlsx]

## Sheet: Table S4
TABLE 4 SOD, POD, and CAT content of sweet sorghum with the addition of different types of exogenous organic acids or biomass materials
Times	Treatments	SOD content (U g-1FW)	POD content (U g-1FW)	CAT content (U g-1FW)
Seedling stage	H	148.0±27.36c	610.8±76.71c	326.5±71.64c
	F	186.6±30.22b	751.6±101.61b	437.8±92.48b
	C	214.9±21.99a	858.0±75.22a	512.6±40.35a
	CH	188.6±25.23b	758.0±117.21b	446.8±83.98b
	CM	144.4±37.07c	610.2±110.66c	318.5±107.18c
	GC	194.0±31.64b	777.7±105.32b	459.3±75.69b
	PN	205.7±29.93a	814.7±109.08a	477.8±73.07a
Elongation stage	H	108.1±15.25b	465.2±60.27c	199.1±37.84b
	F	143.0±18.07a	610.9±71.14a	303.5±49.42a
	C	141.3±25.65a	593.6±90.43b	293.3±59.68a
	CH	131.8±29.01b	543.6±116.90c	262.0±77.41b
	CM	134.5±28.57b	576.4±105.79b	274.0±78.53b
	GC	110.3±9.18c	482.7±31.44d	215.3±19.80c
	PN	146.7±17.81a	623.6±67.42a	310.0±49.52a
Heading stage	H	157.8±12.80b	656.3±35.61c	348.4±19.80c
	F	175.9±16.38a	757.3±58.75a	408.5±34.36a
	C	167.9±11.33ab	723.8±51.31b	385.1±29.39b
	CH	164.0±11.02ab	690.3±40.40c	368.7±24.88c
	CM	170.5±14.42ab	722.0±49.62b	386.2±29.67b
	GC	157.8±10.74b	664.1±42.40d	352.7±23.77d
	PN	176.7±18.61a	773.3±68.58a	415.1±40.41a
The lowercase letters in the table represent whether there is significant difference. The same letters represent insignificant differences, while different letters represent significant differences (p < 0.05) within one development stage. H, humic acid; F, fulvic acid; C, citric acid; CH, cottonseed hull; CM, cow manure; GC, grass charcoal; PN, pine needle.
